# Supplementary material
Source: Springer Nature journal article supplement (https://www.springermedizin.de/resource/supplementary/12955_2014_1418_MOESM1_ESM.pdf/9559484)

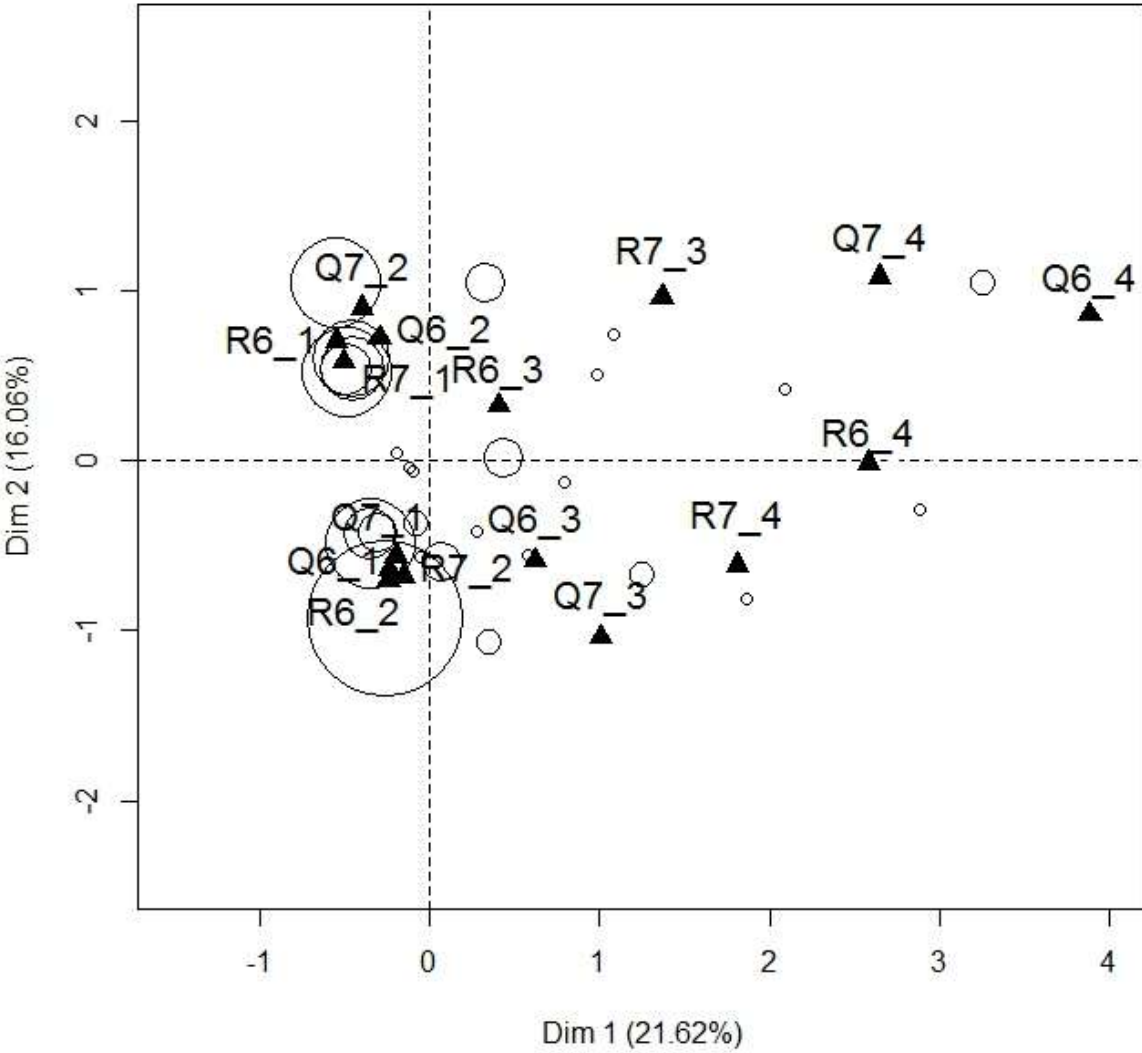

Supplement: MOESM1 [file 9559484]
